# Supplementary material for: Peripheral blood DNA methylation signatures predict response to vedolizumab and ustekinumab in adult patients with Crohn’s disease: The EPIC-CD study
Source: bioRxiv or medRxiv preprint supplement (doi:10.1101/2024.07.25.24310949), 2024-07-25

a

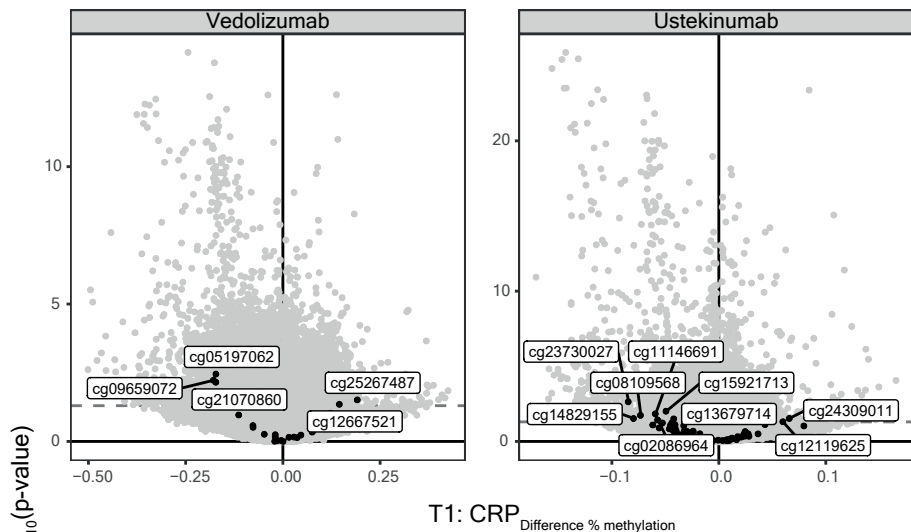

b

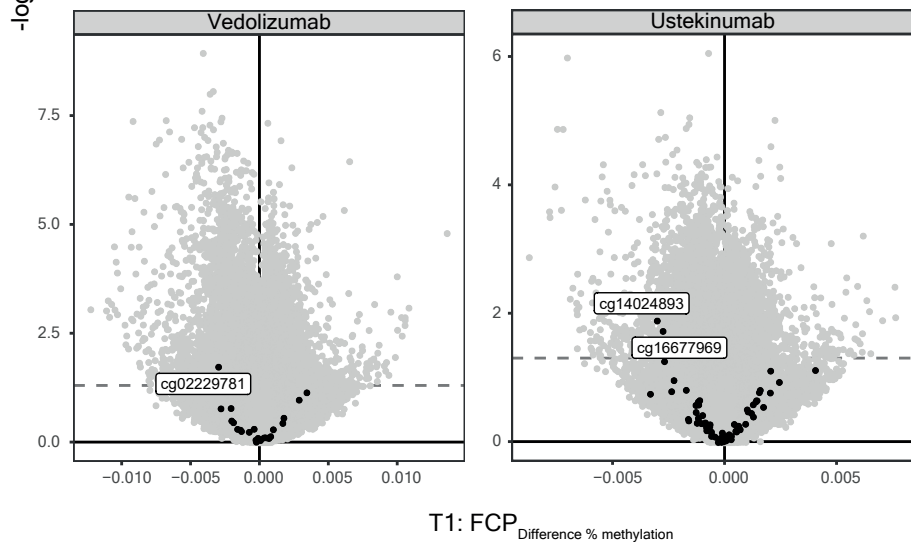

Supplement: Supplementary file [file media-4.pdf]
